# Supplementary material for: A luminescent molecular turnstile
Source: Royal Society of Chemistry journal article supplement (doi:10.1039/c4dt02258k), 2014-01-01
Supplement: c4dt02258k1.pdf [file c4dt02258k1.pdf]

## **Electronic Supplementary Informations**

Nicolas Zigon, Patrick Larpent, Abdelaziz Jouaiti, Nathalie Kyritsakas, Mir  
Wais Hosseini

Molecular Tectonics Laboratory (UMR 7140)

University of Strasbourg

Institut Le Bel, 4 rue Blaise Pascal, 67000 Strasbourg, France

Tel: +33 3 68 85 13 23

Fax: + 33 3 68 85 13 25

E-mail: [hosseini@unistra.fr](mailto:hosseini@unistra.fr)

# 1D-NMR $^1\text{H}$ and $^{13}\text{C}$ spectra and mass spectra of the compounds

## Compound 1

### $^1\text{H-NMR}$ ( $\text{CD}_2\text{Cl}_2$ , 298 K, 600 MHz)

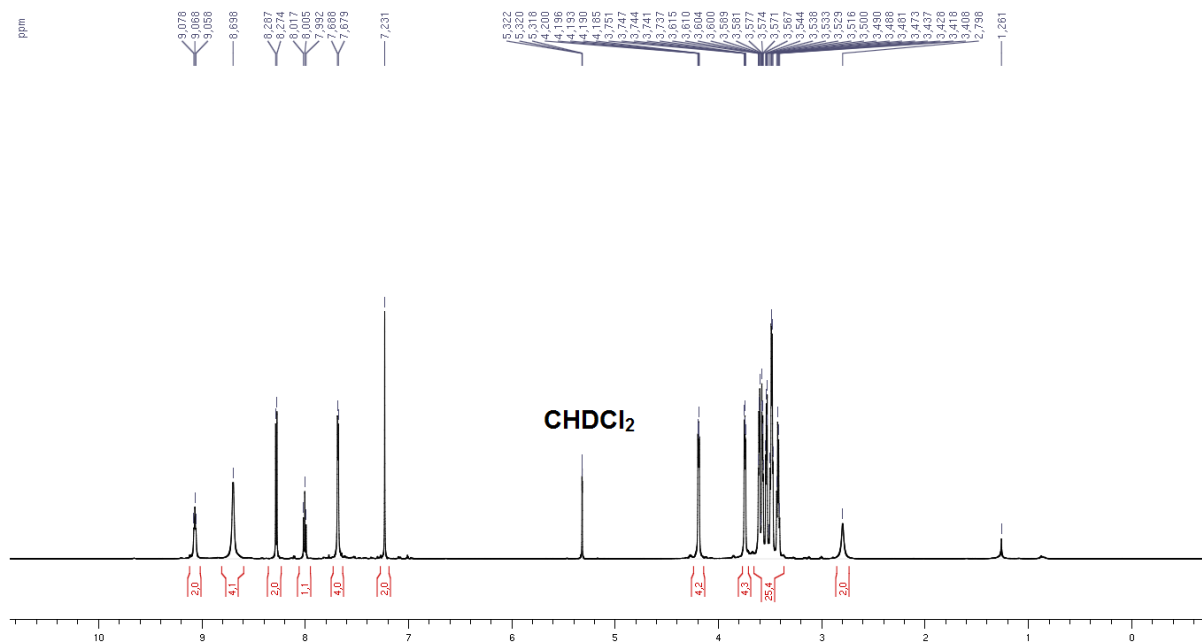

### $^{13}\text{C-NMR}$ ( $\text{CDCl}_3$ , 298 K, 125 MHz)

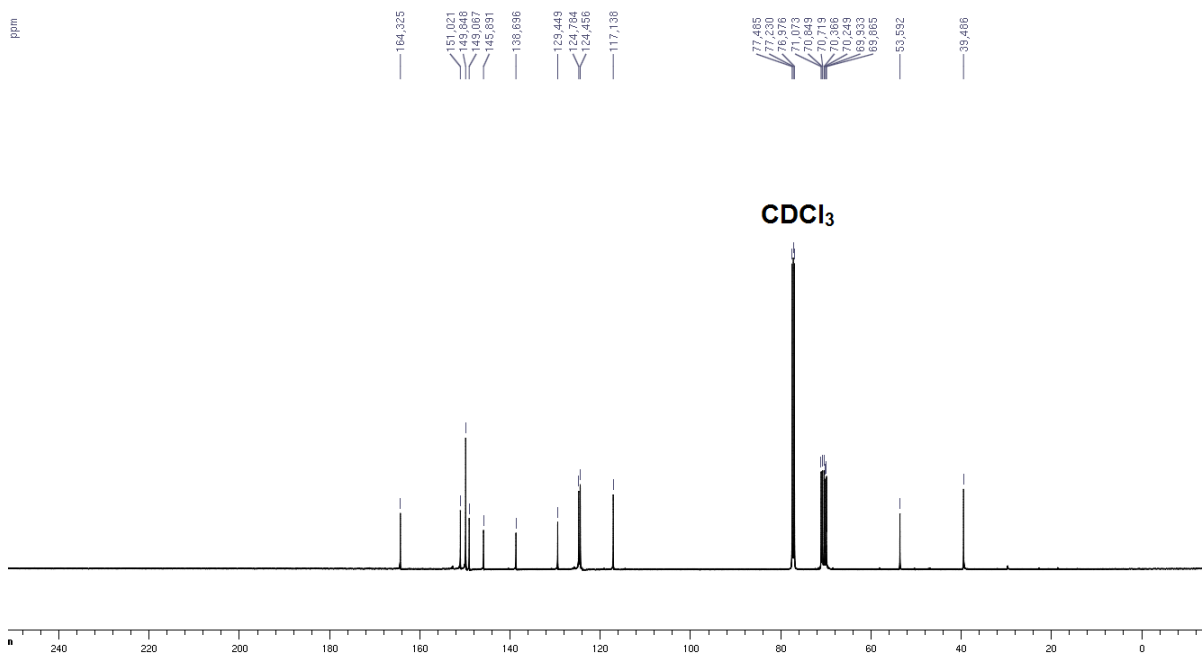

DEPT  $^{13}\text{C}$ -NMR ( $\text{CDCl}_3$ , 298 K, 125 MHz)

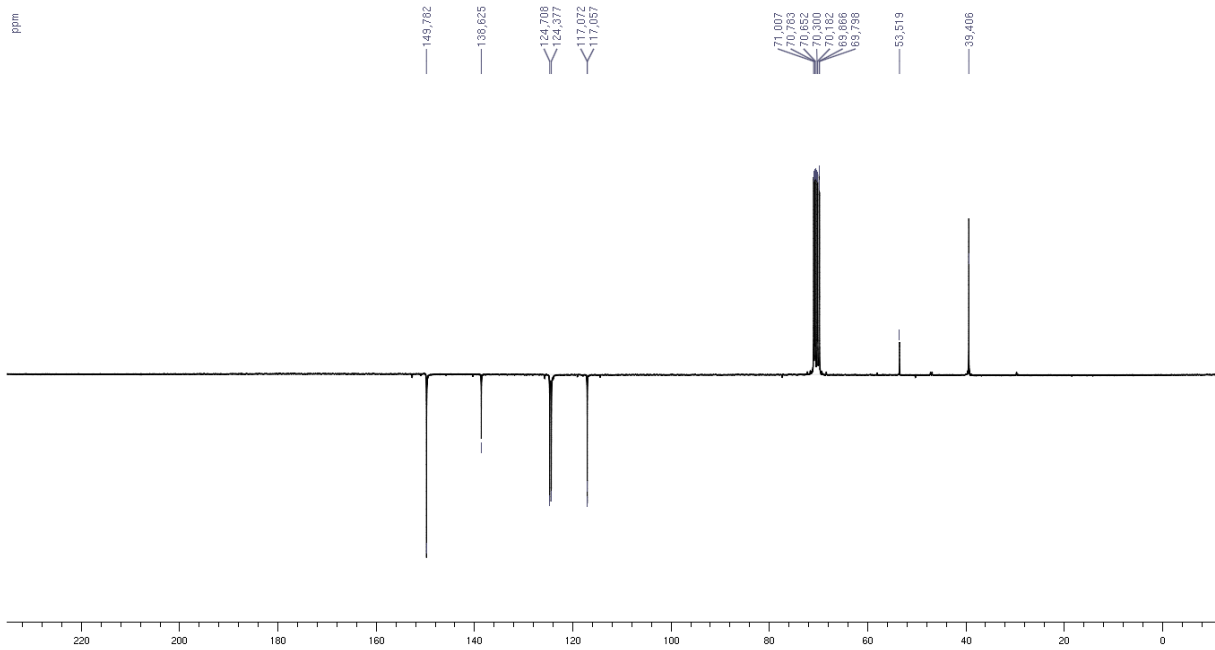

ESI MS

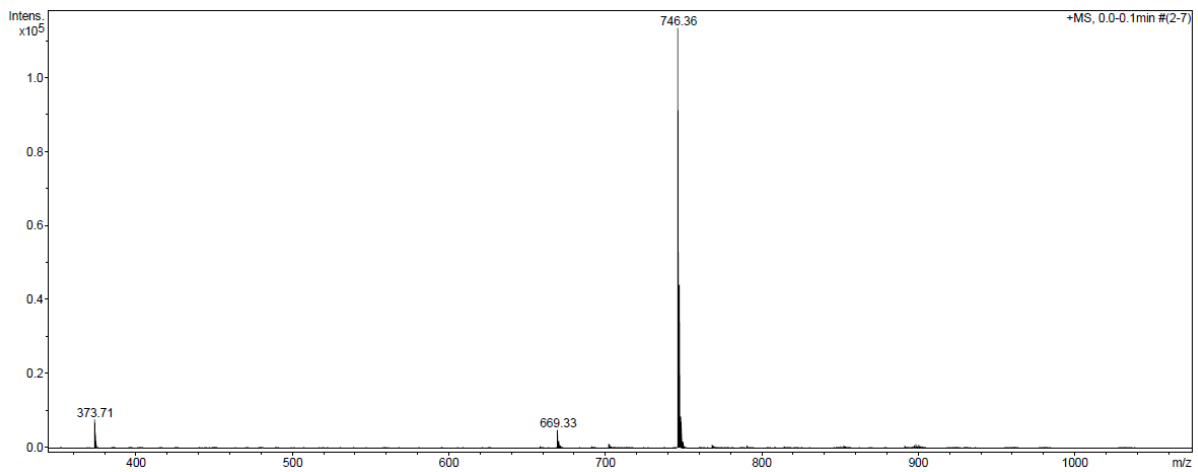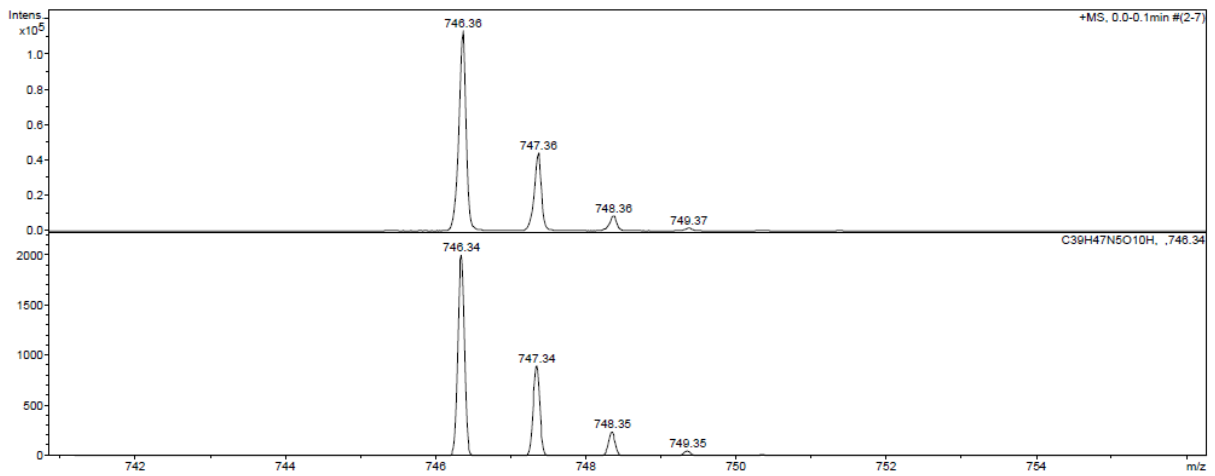

# Compound 1-Pd

## $^1\text{H-NMR}$ ( $\text{CD}_2\text{Cl}_2$ , 298 K, 600 MHz)

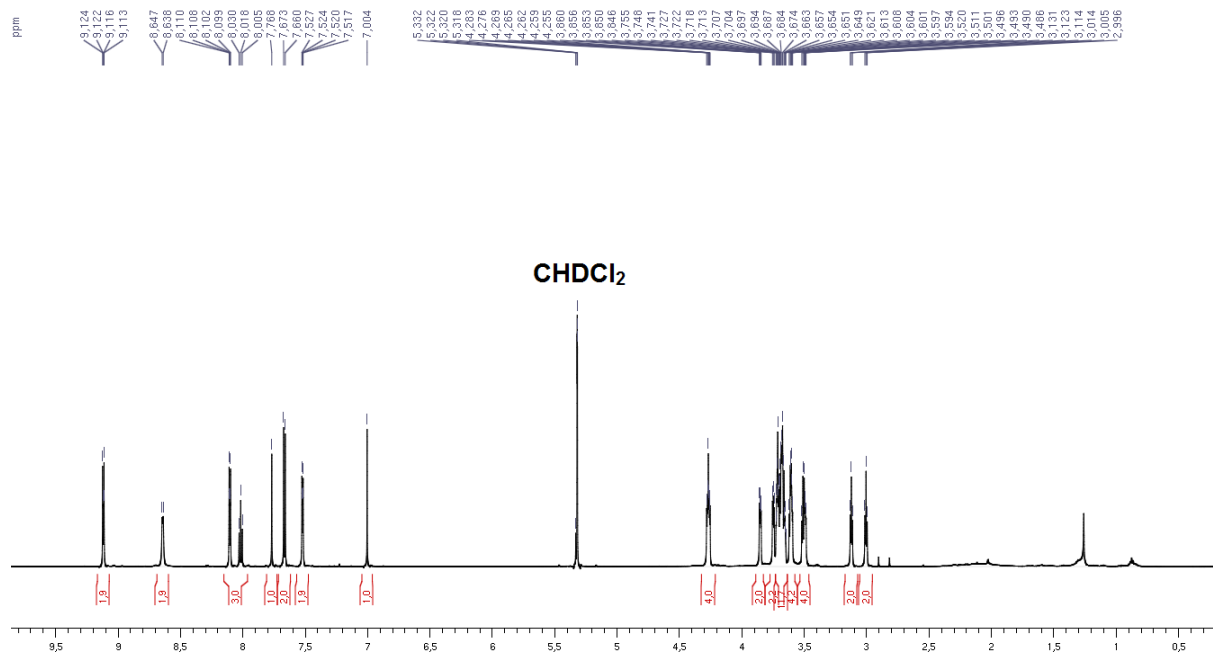

## $^{13}\text{C-NMR}$ ( $\text{CD}_2\text{Cl}_2$ , 298 K, 125 MHz)

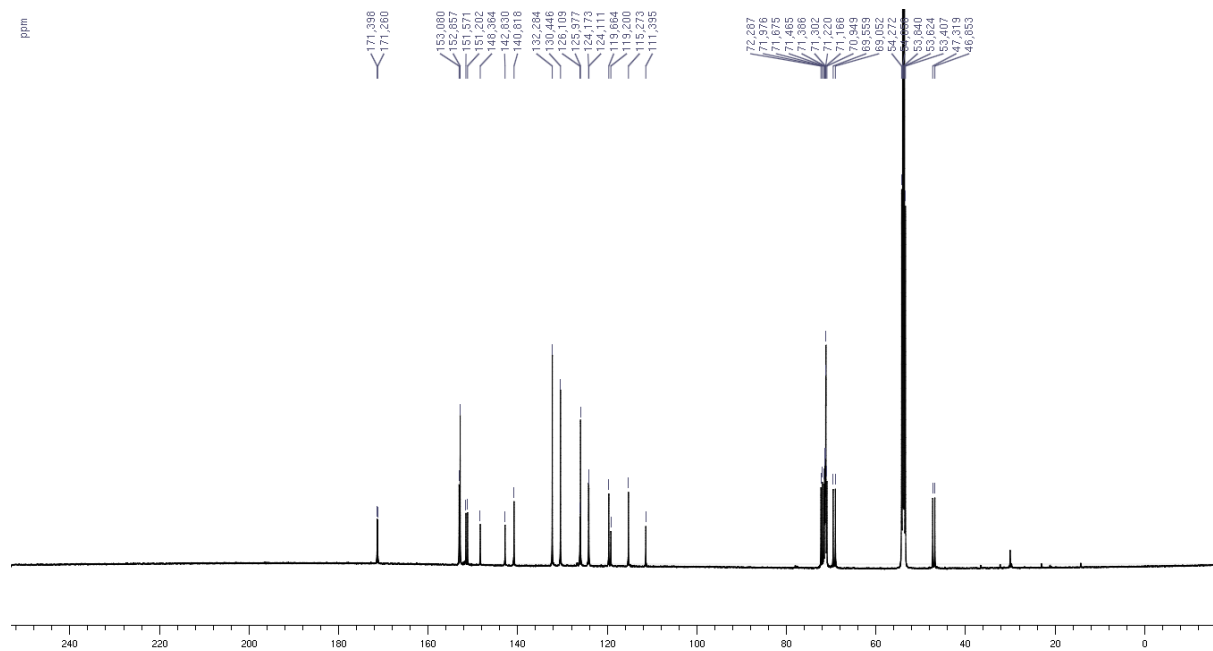

# ESI MS

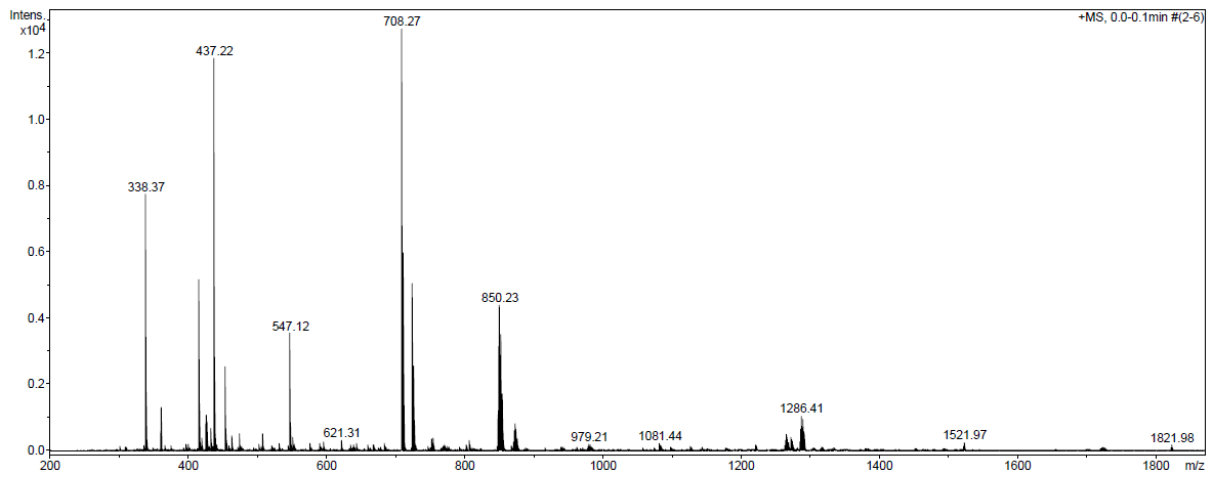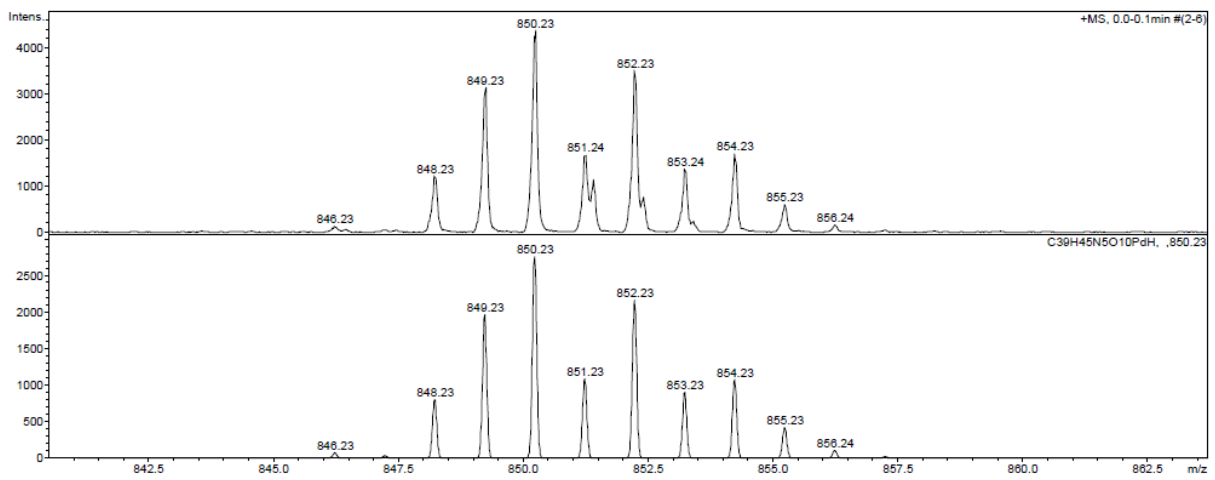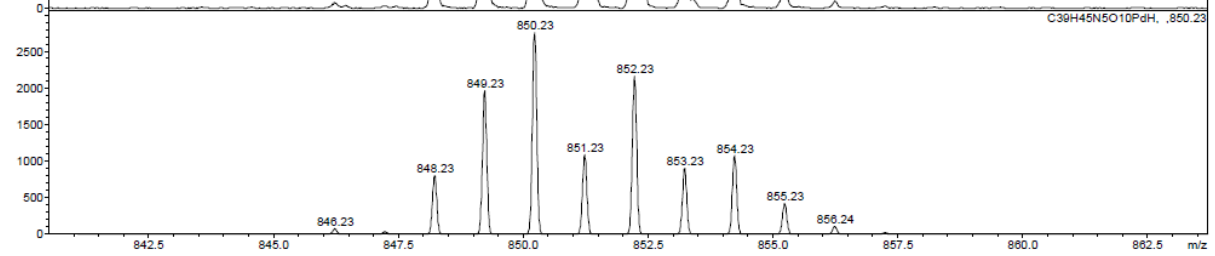

## Luminescence spectra

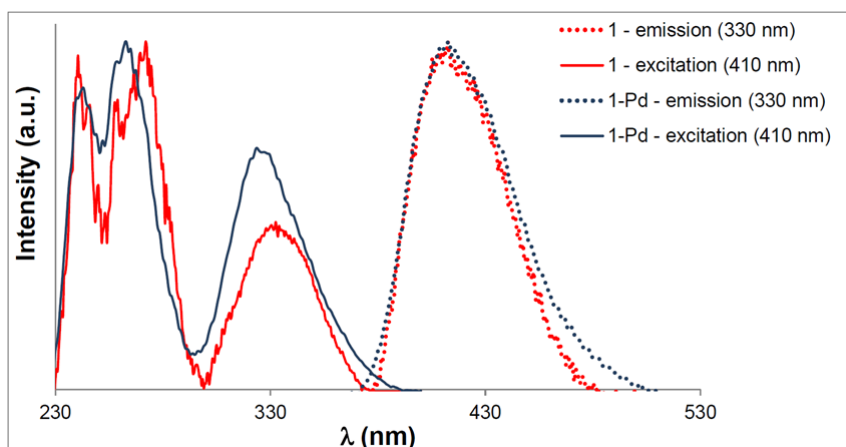

**Figure S1** Normalized emission and excitation spectra ( $\text{CH}_2\text{Cl}_2$ , 298 K, aerated) for turnstiles **1** and **1-Pd**. The number inside of the brackets indicates either the excitation wavelength (for the emission spectra) or the reading wavelength (for the excitation spectra).

|             | $\lambda_{\text{absorption}}$ - nm |     |     | $\lambda_{\text{excitation}}$ - nm |     |     | $\lambda_{\text{emission}}$ - nm | $\rho$ | $\tau$         |
|-------------|------------------------------------|-----|-----|------------------------------------|-----|-----|----------------------------------|--------|----------------|
| <b>1</b>    | 235                                | 274 | 335 | 240                                | 273 | 334 | 413                              | 0,78   | 3,6 ns         |
| <b>1-Pd</b> | 249                                | 282 | 348 | 243                                | 263 | 326 | 413                              | 0,006  | 3,6 ns ; 88 ps |

**Table S2** Summary of the UV-visible absorption, excitation and emission maxima, quantum yields and lifetimes measured.
